# Supplementary material for: Furanocoumarins as Enhancers of Antitumor Potential of Sorafenib and LY294002 toward Human Glioma Cells In Vitro
Source: MDPI journal article supplement (doi:10.3390/ijms25020759), 2024-01-07
Supplement: s1 [file s1]

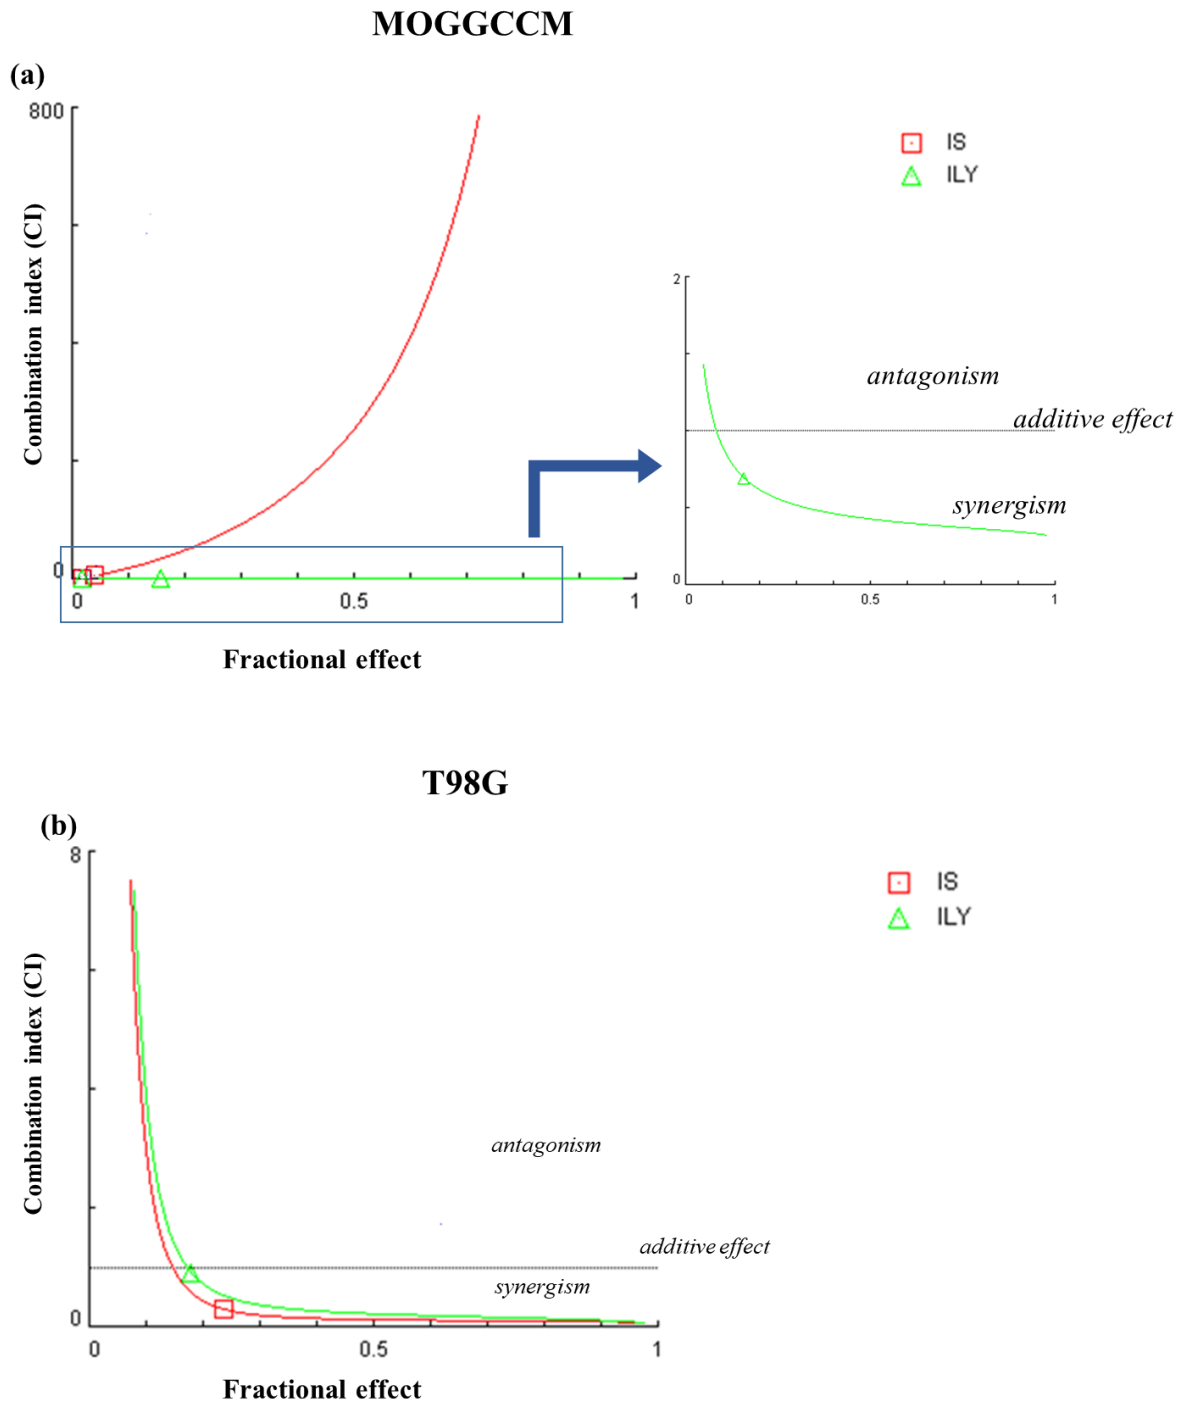

**Figure S1** Imperatotin and LY294002 and/or sorafenib combination treatment in MOGGCCM (a) and T98G (b) cells. Combination index (CI) plot: The combination index is plotted as a function of  $F_a$  (fractional effect). Combination index (CI) was calculated according to the method of Chou and Talalay using the Compusyn software.  $CI < 1$ ,  $CI = 1$  and  $CI > 1$  indicate synergistic effect, additive effect, and antagonistic effect, respectively.

# MOGGCCM

# T98G

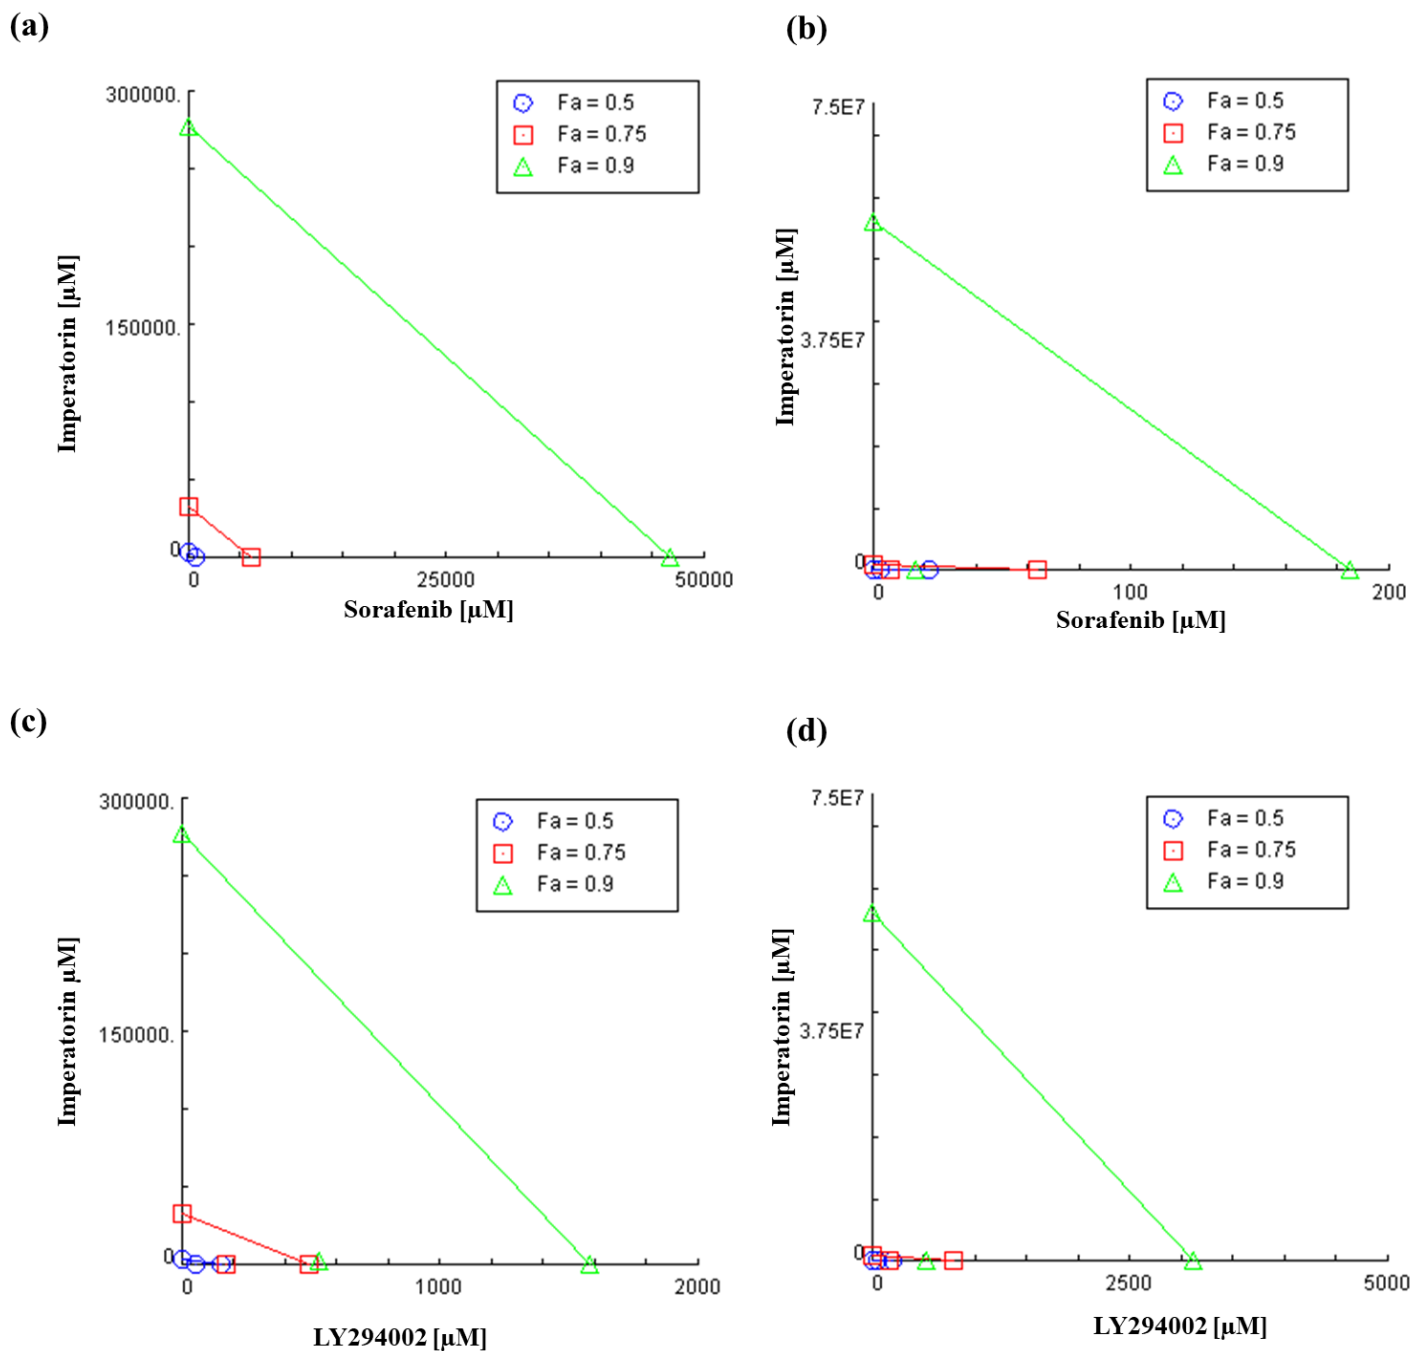

**Figure S2** Isobologram for combination of imperatorin and sorafenib (a,b) or LY294002 (c,d) in MOGGCCM (a,c) and T98G (b,d) cell line. Classic isobologram at IC<sub>50</sub>, IC<sub>75</sub>, and IC<sub>90</sub>. (c) the Fa-DRI (dose reduction index) plot (Chou-Martin plot)

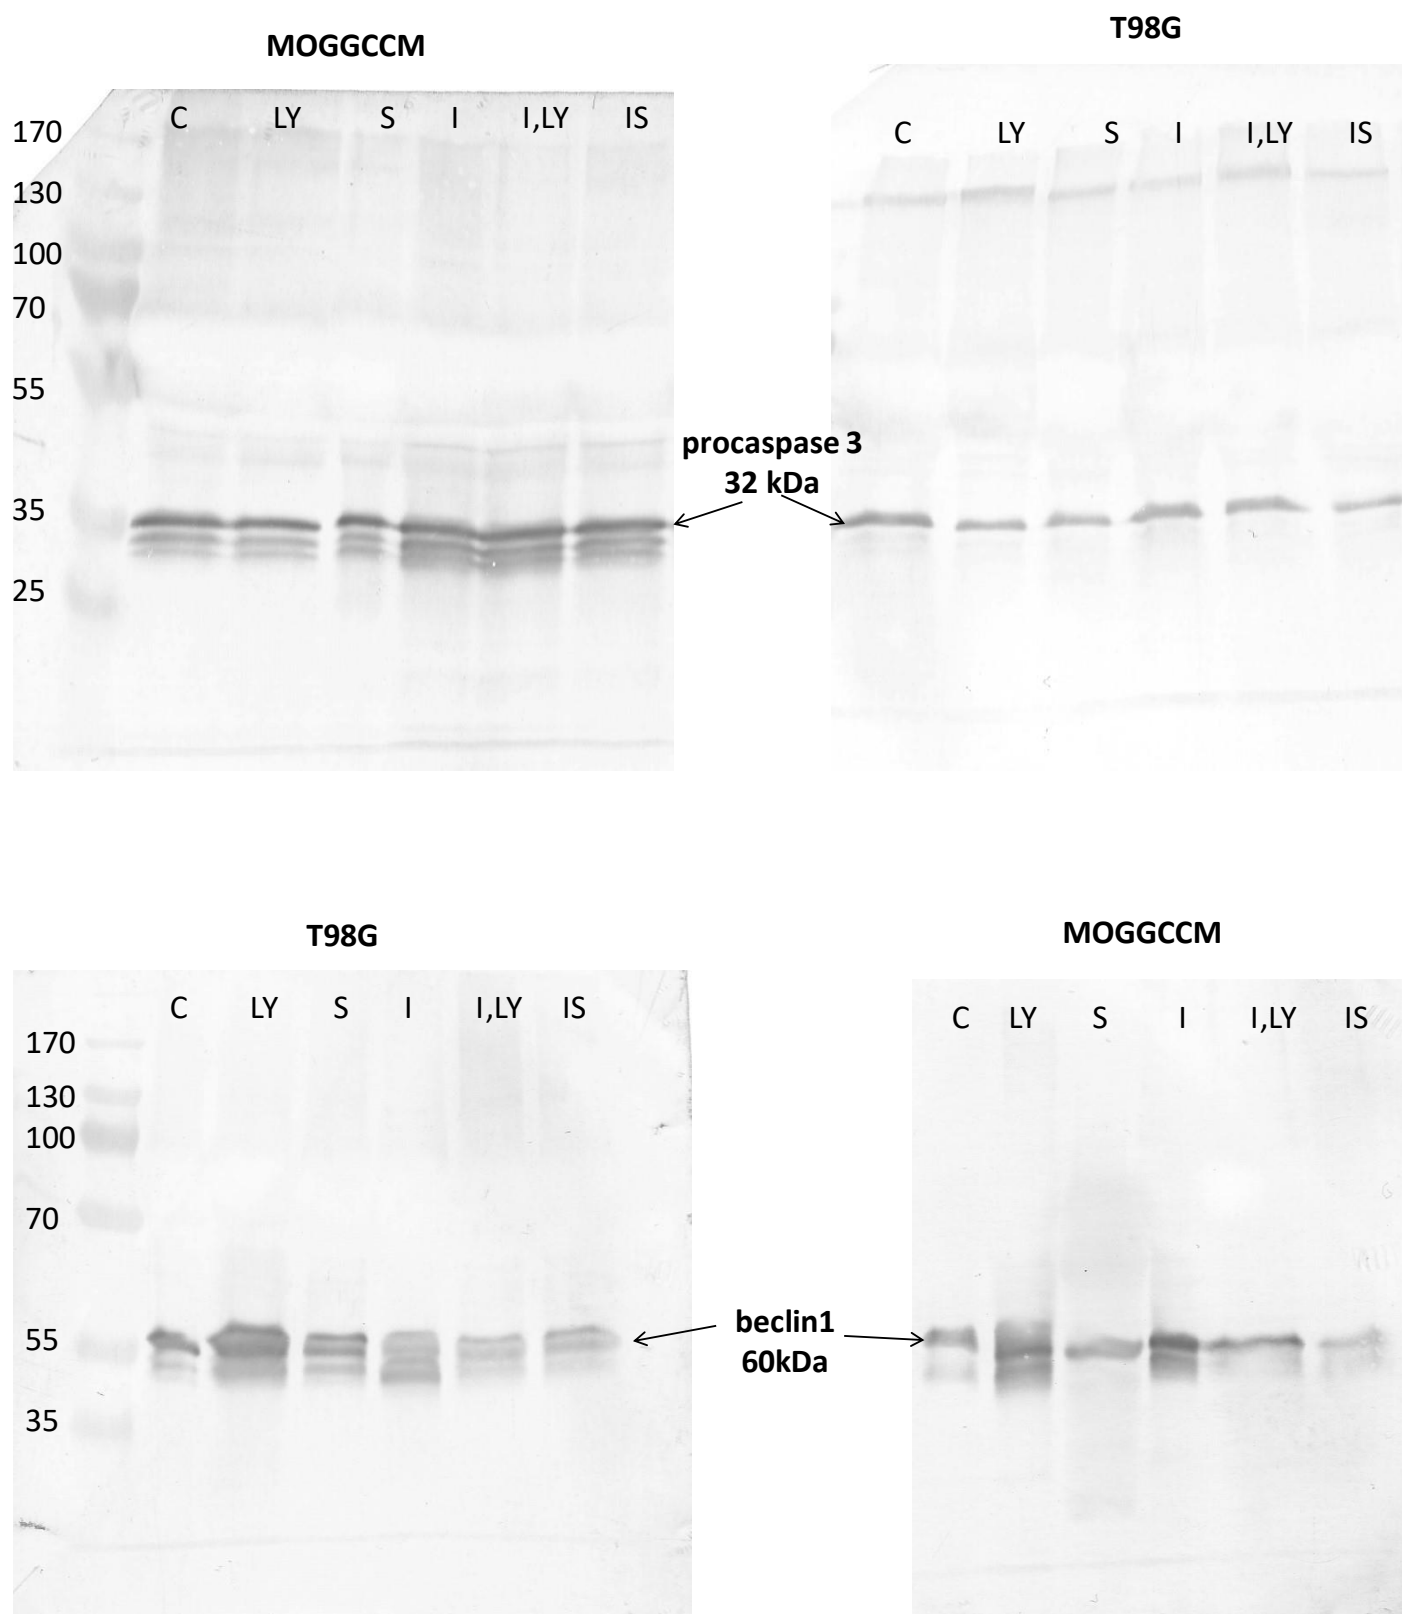

**Figure S3** Whole immunoblotting membranes of procaspase 3 and beclin 1 in MOGGCCM and T98G cells. C – control, LY – LY294002, S – sorafenib, I – imperatorin.

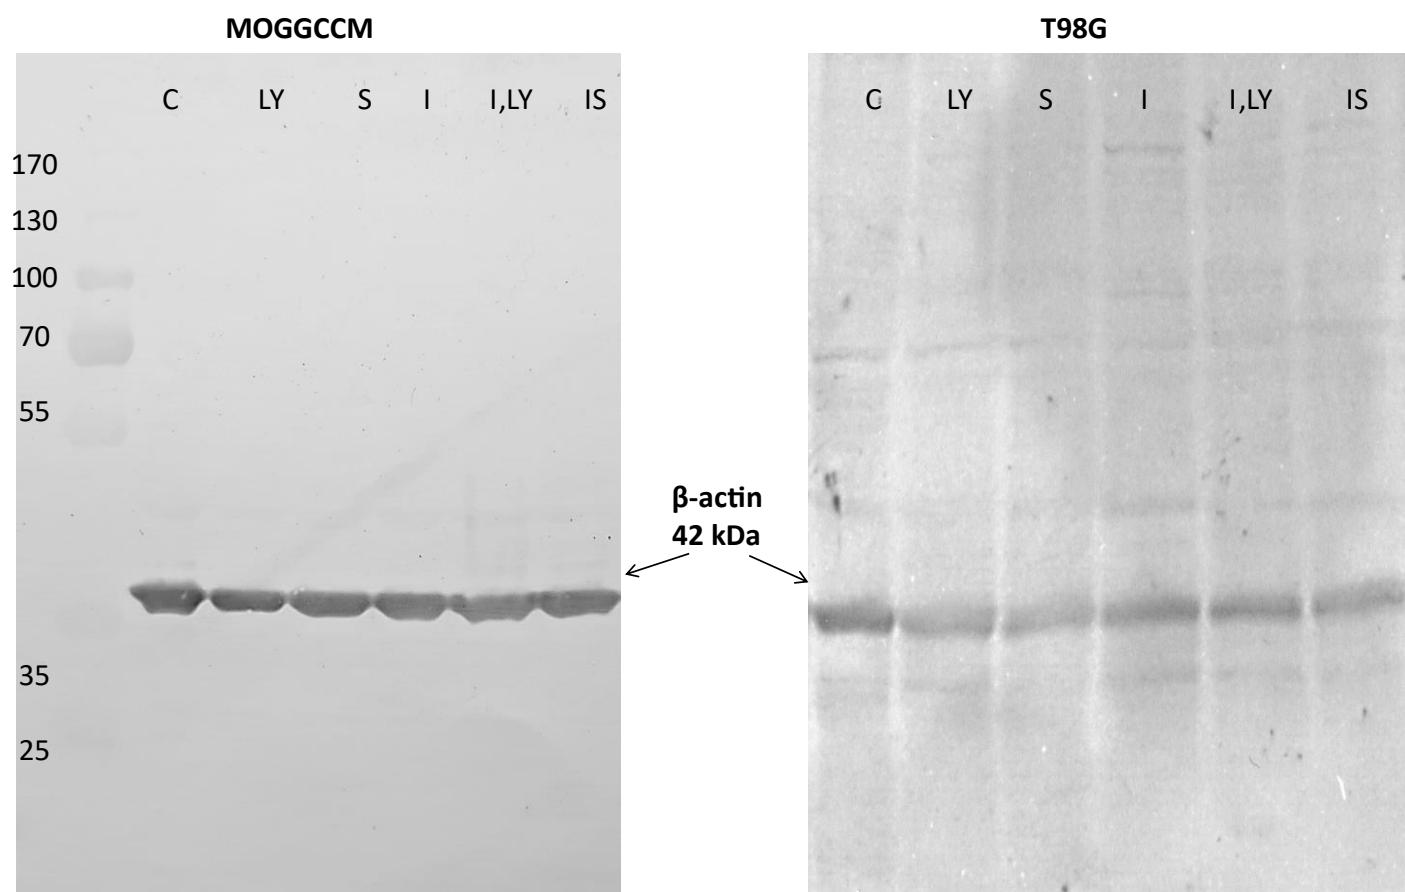

**Figure S4** Whole immunoblotting membranes of  $\beta$ -actin in MOGGCCM and T98G cells. C – control, LY – LY294002, S – sorafenib, I – imperatorin.

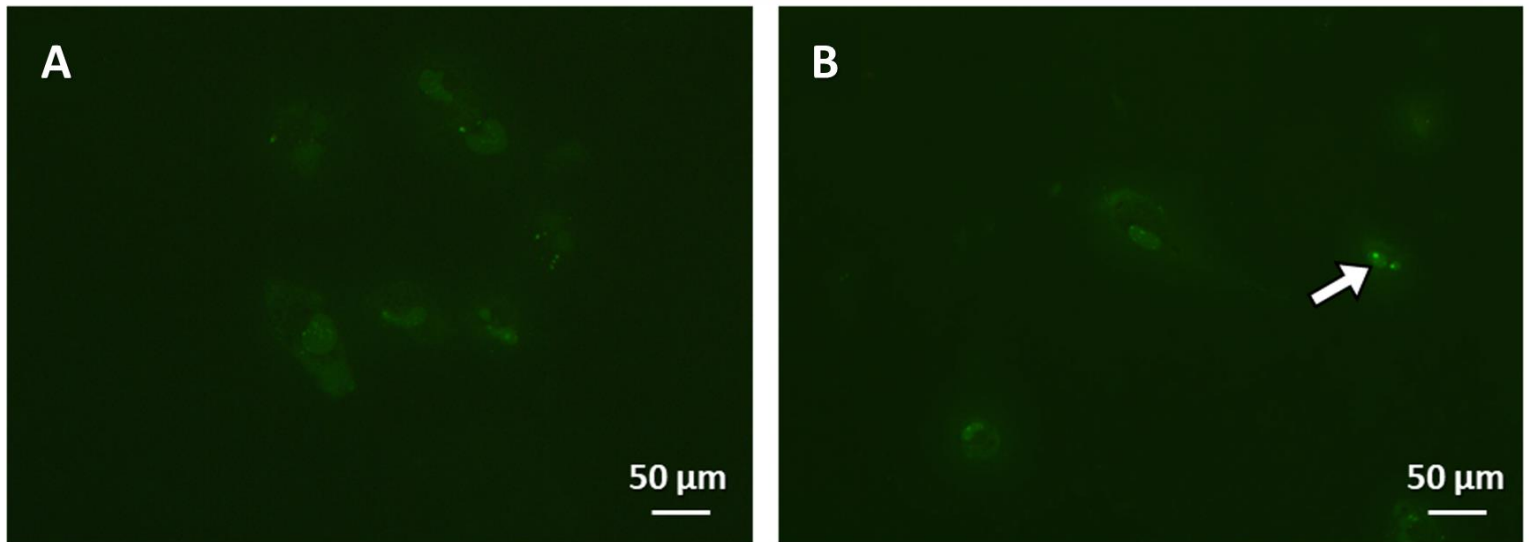

**Figure S5** Representative photos of transfection efficiency control in cancer cells. (A) – non - transfected cells, (B) – control siRNA transfected cells (white arrow)
